# Supplementary material for: A Label-Free Impedance Immunosensor Using Screen-Printed Interdigitated Electrodes and Magnetic Nanobeads for the Detection of E. coli O157:H7
Source: MDPI journal article supplement (doi:10.3390/bios5040791), 2015-12-15
Supplement: s1 [file s1]

## Supplementary Information

# A Label-Free Impedance Immunosensor Using Screen-Printed Interdigitated Electrodes and Magnetic Nanobeads for the Detection of *E. coli* O157:H7. *Biosensors* 2015, 5, 791-803

Ronghui Wang <sup>1</sup>, Jacob Lum <sup>2</sup>, Zach Callaway <sup>1</sup>, Jianhan Lin <sup>3</sup>, Walter Bottje <sup>4</sup> and Yanbin Li <sup>1,2,4,5,\*</sup>

<sup>1</sup> Department of Biological and Agricultural Engineering, University of Arkansas, Fayetteville, AR 72701, USA; E-Mails: rwang@uark.edu (R.W.); zcallawa@uark.edu (Z.C.)

<sup>2</sup> Cell and Molecular Biology Program, University of Arkansas, Fayetteville, AR 72701, USA; E-Mail: jlum@pacificvetgroup.com

<sup>3</sup> College of Information and Electrical Engineering, China Agricultural University, Beijing 100083, China; E-Mail: jianhan@cau.edu.cn

<sup>4</sup> Center of Excellence for Poultry Science, University of Arkansas, Fayetteville, AR 72701, USA; E-Mail: wbottje@uark.edu

<sup>5</sup> College of Biosystems Engineering and Food Science, Zhejiang University, Hangzhou 310068, China

\* Author to whom correspondence should be addressed; E-Mail: yanbinli@uark.edu; Tel.: +1-479-575-2881; Fax: +1-479-575-2846.

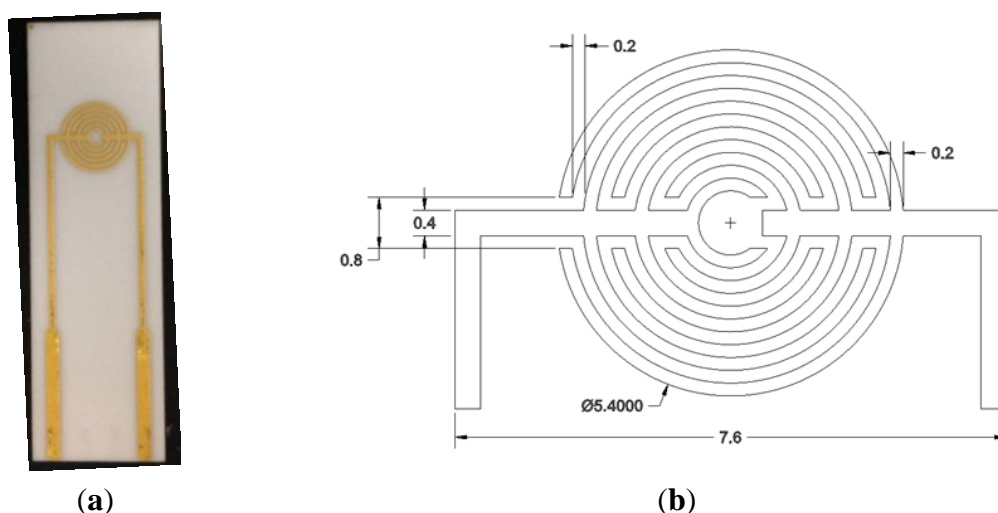

**Figure S1.** (a) A photograph of the screen printed electrode and (b) drawing of the interdigitated electrode. Dimensions are given in millimeters.

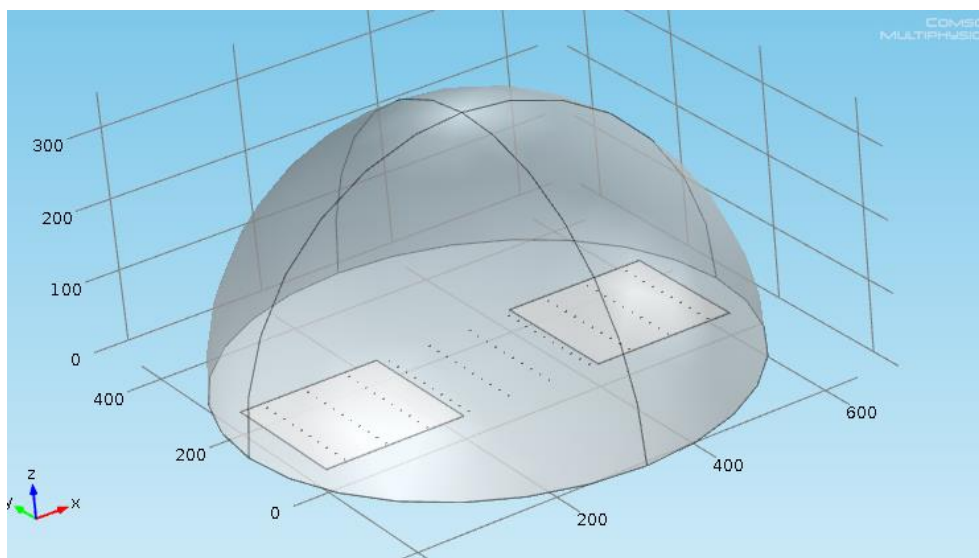

**Figure S2.** COMSOL model of simplified biosensor system with a pair of electrodes and 100 cells of *E. coli* evenly distributed on the electrode surfaces and the space between two fingers.

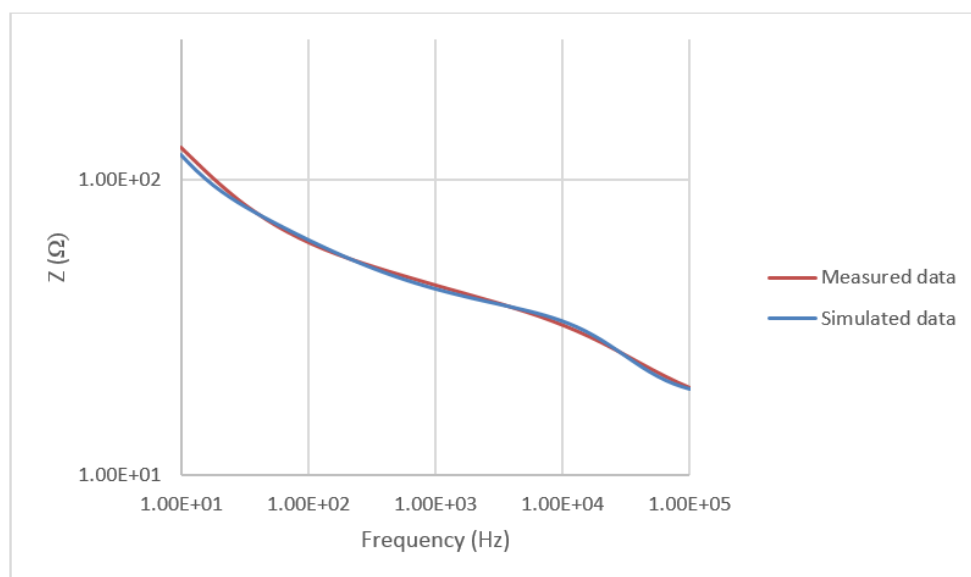

**Figure S3.** Bode diagram of measured impedance data and simulated impedance data generated by curve fitting of equivalent circuit. Measured data was taken with a sample containing  $10^7$  cfu  $\text{mL}^{-1}$  *E. coli* O157:H7.

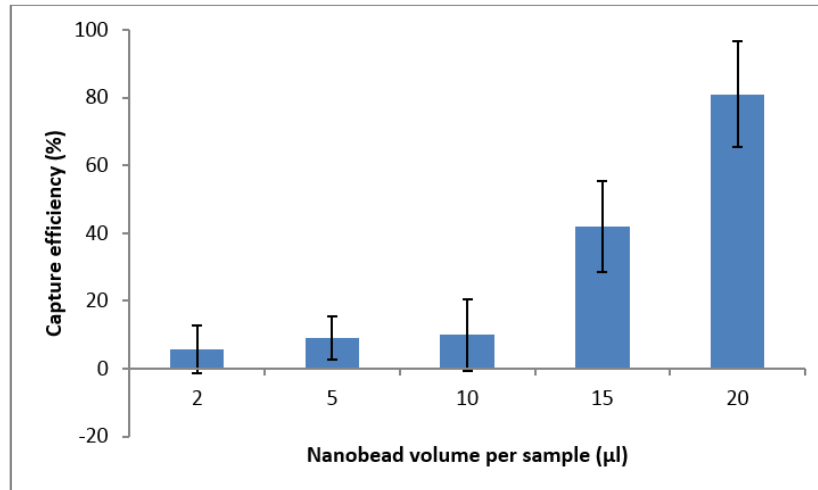

**Figure S4.** Capture efficiency of  $10^5$  cfu mL<sup>-1</sup> *E. coli* O157:H7 using different amounts of antibody-coated magnetic nanobeads. The concentration of nanobeads was 1 mg mL<sup>-1</sup>.

© 2015 by the authors; licensee MDPI, Basel, Switzerland. This article is an open access article distributed under the terms and conditions of the Creative Commons Attribution license (<http://creativecommons.org/licenses/by/4.0/>).
